# Supplementary material for: A simple and fast method based on functionalized magnetic nanoparticles for the determination of Ag(i), Au(iii) and Pd(ii) in mine stone, road dust and water samples
Source: Royal Society of Chemistry journal article supplement (doi:10.1039/c7ay00596b), 2017-01-01
Supplement: c7ay00596b1.pdf [file c7ay00596b1.pdf]

**A simple and fast method based on functionalized magnetic nanoparticles for  
determination of Ag(I), Au(III) and Pd(II) in mine stone, road dust and water samples**

Sara Karami, Homeira Ebrahimzadeh\*, Ali Akbar Asgharinezhad

*Faculty of Chemistry, Shahid Beheshti University, G.C., Evin, Tehran, Iran*

\* Corresponding author. Tel.: +98 21 29902891; fax: +98 21 22403041.

E-mail address: h-ebrahim@sbu.ac.ir (H. Ebrahimzadeh)

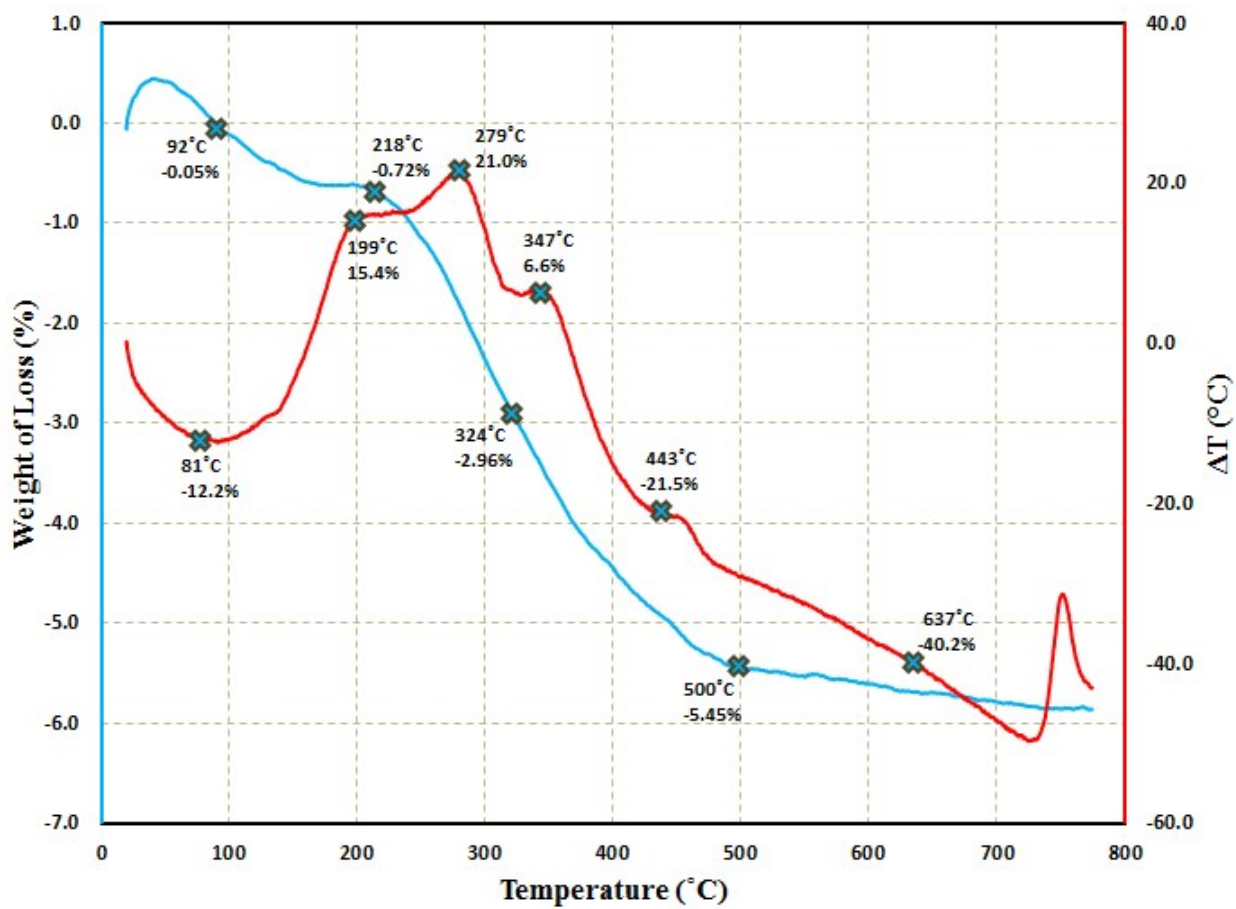

Fig. 1S: TGA/DTA curves of Fe<sub>3</sub>O<sub>4</sub>@Mu nanosorbent.

**Table 1S**

The tolerance limit of potentially interfering ions in the determination of Ag(I), Au(III) and Pd(II) ions.

| Interfering Ions               | Tolerable concentration ratio X/Ag(I), Au(III) and Pd(II) | Recovery (%) |            |            |
|--------------------------------|-----------------------------------------------------------|--------------|------------|------------|
|                                |                                                           | Ag(I)        | Au(III)    | Pd(II)     |
| Na <sup>+</sup>                | 10000                                                     | 98.0 ± 2.0   | 97.3 ± 2.7 | 99.1 ± 1.9 |
| K <sup>+</sup>                 | 10000                                                     | 96.5 ± 1.6   | 94.8 ± 2.0 | 99.3 ± 2.5 |
| Ca <sup>2+</sup>               | 1000                                                      | 97.8 ± 2.3   | 96.6 ± 3.0 | 98.4 ± 2.1 |
| Mg <sup>2+</sup>               | 1000                                                      | 98.5 ± 2.0   | 97.3 ± 2.8 | 98.1 ± 1.8 |
| Pb <sup>2+</sup>               | 1000                                                      | 99.0 ± 2.0   | 97.2 ± 3.5 | 98.3 ± 2.6 |
| Mn <sup>2+</sup>               | 1000                                                      | 97.4 ± 2.8   | 98.3 ± 1.4 | 98.8 ± 2.0 |
| Zn <sup>2+</sup>               | 1000                                                      | 98.8 ± 1.7   | 99.0 ± 1.0 | 97.5 ± 2.8 |
| Ni <sup>2+</sup>               | 1000                                                      | 97.2 ± 2.4   | 97.9 ± 2.8 | 98.0 ± 3.2 |
| Co <sup>2+</sup>               | 1000                                                      | 98.7 ± 3.0   | 96.5 ± 2.0 | 97.3 ± 2.0 |
| Cu <sup>2+</sup>               | 1000                                                      | 99.2 ± 1.9   | 99.3 ± 3.2 | 97.6 ± 2.4 |
| Cr <sup>3+</sup>               | 1000                                                      | 96.0 ± 1.0   | 95.3 ± 1.1 | 95.3 ± 1.1 |
| Pt <sup>2+</sup>               | 100                                                       | 94.6 ± 2.0   | 93.7 ± 2.0 | 95.6 ± 2.1 |
| Hg <sup>2+</sup>               | 100                                                       | 97.6 ± 3.1   | 94.1 ± 2.2 | 96.8 ± 2.0 |
| Br <sup>-</sup>                | 5000                                                      | 96.7 ± 1.8   | 97.2 ± 2.0 | 95.2 ± 2.6 |
| NO <sub>3</sub> <sup>-</sup>   | 2000                                                      | 97.0 ± 1.5   | 98.8 ± 2.0 | 98.2 ± 2.0 |
| CrO <sub>4</sub> <sup>2-</sup> | 100                                                       | 94.1 ± 3.5   | 95.9 ± 2.3 | 95.0 ± 1.6 |
| AsO <sub>4</sub> <sup>3-</sup> | 100                                                       | 96.0 ± 1.7   | 95.5 ± 2.0 | 94.1 ± 2.4 |

**Table 2S**

Comparison of the proposed method with other methods applied for the extraction and determination of target ions.

| Detection system      | Sorbent                                                 | Analytes   | LOD <sup>a</sup> | LDR      | Sorption time (min) | SC <sup>b</sup> | RSD (%) | Ref.      |
|-----------------------|---------------------------------------------------------|------------|------------------|----------|---------------------|-----------------|---------|-----------|
| ICP-OES <sup>c</sup>  | Polythiophene-coated Fe <sub>3</sub> O <sub>4</sub> NPs | Ag, Au, Pd | 0.2-2.0          | 0.75-100 | 12                  | -               | 4.2     | [1]       |
| FAAS                  | SBA <sup>d</sup> -15-NH <sub>2</sub>                    | Ag         | 4.0              | -        | -                   | 137             | 1.7     | [3]       |
| FI <sup>d</sup> -FAAS | Silica gel based chelating sorbent                      | Ag, Au, Pd | 1.3-21           | -        | 40                  | 24.5-50.9       | 3.0     | [26]      |
| FI-FAAS               | Carboxylated pillar[5]arene                             | Au, Pd     | 15.9-16          | 50-1000  | -                   | 12-16           | < 0.8   | [27]      |
| FAAS                  | Fe <sub>3</sub> O <sub>4</sub> @murexide NPs            | Ag, Au, Pd | 0.15-0.6         | 0.5-400  | 5.0                 | 34-50           | 5.0-7.5 | This work |

<sup>a</sup> μg L<sup>-1</sup>

<sup>b</sup> Sorption capacity (mg g<sup>-1</sup>)

<sup>c</sup> Inductively coupled plasma optical emission spectrometry

<sup>d</sup> Santa Barbara Amorphous type material

<sup>e</sup> Flow injection

[26] P. Liu, Q. Pu, Z. Su, *Analyst* 2000, **125**, 147-150.

[27] S.-Y. Zhou, N. Song, S.-X. Liu, D.-X. Chen, Q. Jia, Y.-W. Yang, *Microchim. Acta* 2014, **181**, 1551-1556.
